# Supplementary material for: Improving the performance of inverted two-dimensional perovskite solar cells by adding an anti-solvent into the perovskite precursor
Source: Royal Society of Chemistry journal article supplement (doi:10.1039/d0tc03133j), 2020-01-01
Supplement: d0tc03133j1.pdf [file d0tc03133j1.pdf]

## Supporting Information for

# **Improving the performance of inverted two-dimensional perovskite solar cells by adding anti-solvent into perovskite precursor**

Zhihai Liu,<sup>a</sup> Lei Wang,<sup>b</sup> Xiaoyin Xie,<sup>c,\*</sup>

<sup>a</sup>*School of Opto-Electronic Information Science and Technology, Yantai University,*

*Yantai, 264005, China*

<sup>b</sup>*Department of Packing Engineering, Beijing Technology and Business University, Beijing, 100048, China*

<sup>c</sup>*Department of Chemical Technology, Jilin Institute of Chemical Technology, Jilin,*

*132022, China, Email: xyxie@jlict.edu.cn*

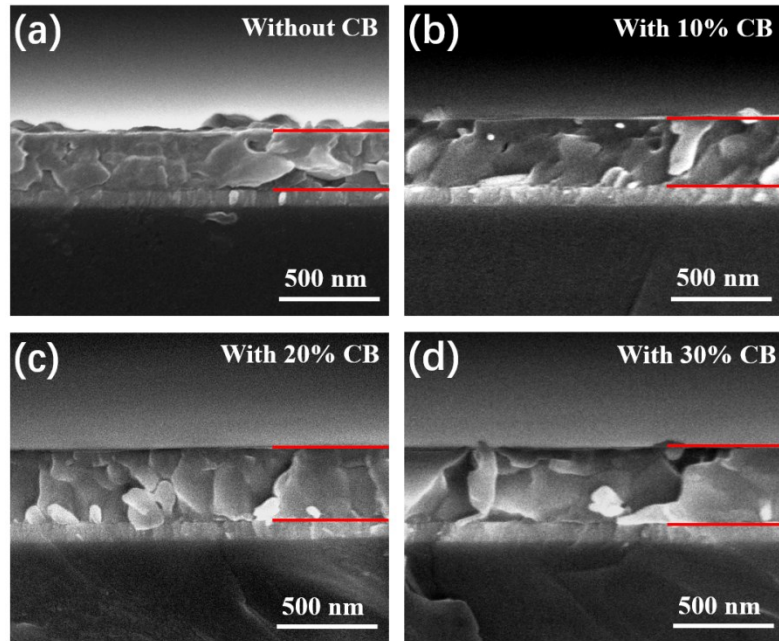

**Fig. S1.** Cross-sectional SEM images of perovskite films processed from precursor (a) without CB, (b) with 10% CB, (c) with 20% CB and (d) with 30% CB.

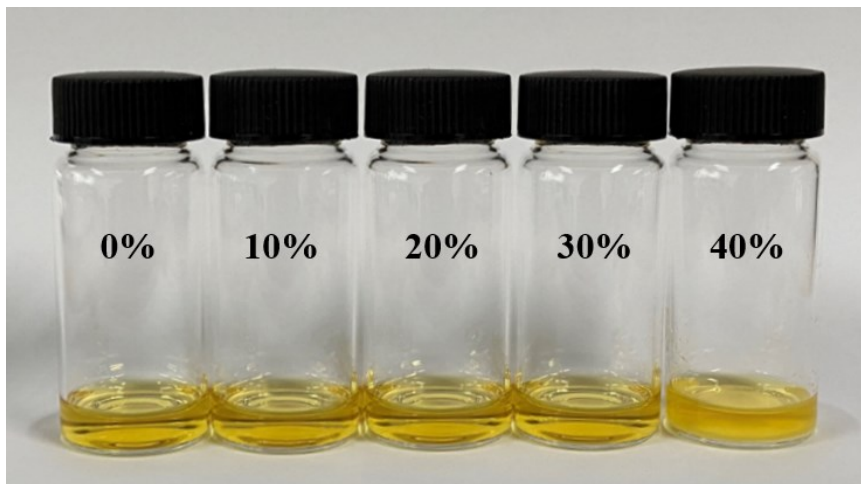

**Fig. S2.** Photographs of perovskite precursors without and with 10%, 20%, 30% and 40% CB

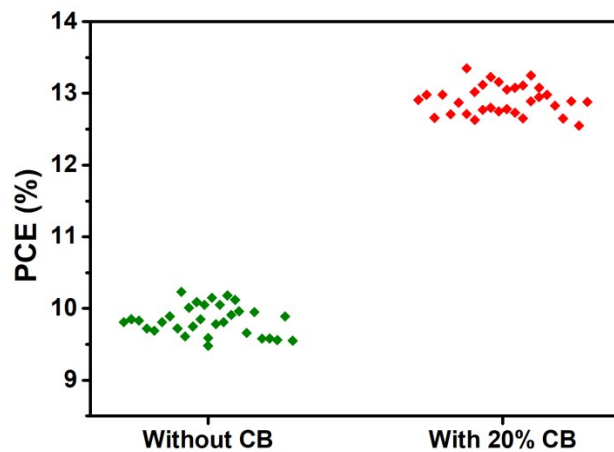

**Fig. S3.** Statistic PCE values for 32 individual PSCs processed from precursor without and with 20% CB.

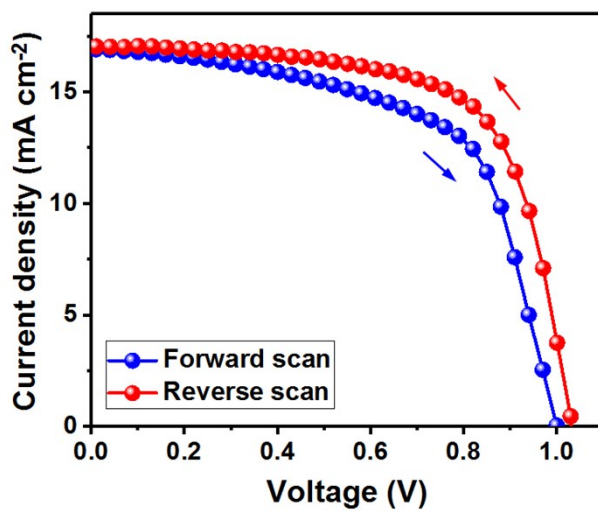

**Fig. S4.** Forward and reverse  $J$ - $V$  characteristics of the best performance 2D PSC processed from precursor without CB.
